# Supplementary material for: Enhancer architecture sensitizes cell specific responses to Notch gene dose via a bind and discard mechanism
Source: eLife journal article supplement (doi:10.7554/elife.53659), 2020-04-16
Supplement: supp [file elife-53659-supp-v1.zip]

Archive with 9 entries (9 files):
- elife_poa_e53659_Supplementary_file_1.docx
- elife_poa_e53659_Figure_3_figure_supplement_2.jpg
- elife_poa_e53659_Figure_1_figure_supplement_2.jpg
- elife_poa_e53659_Figure_4_figure_supplement_1.jpg
- elife_poa_e53659_Figure_2_figure_supplement_1.jpg
- elife_poa_e53659_Figure_3_figure_supplement_1.jpg
- elife_poa_e53659_Figure_1_figure_supplement_1.jpg
- elife_poa_e53659_Figure_4_figure_supplement_2.jpg
- elife_poa_e53659_Transparent_Reporting_File.pdf
