# Supplementary material for: Enhancer architecture sensitizes cell specific responses to Notch gene dose via a bind and discard mechanism
Source: eLife journal article supplement (doi:10.7554/elife.53659), 2020-04-16
Supplement: supp [file elife-53659-supp-v1.zip › elife_poa_e53659_Supplementary_file_1.docx]

Supplementary File 1. Genetic crosses performed to generate the analyzed progeny.

|  | Female | Male |
| --- | --- | --- |
| Figure 1G | *6SG-lacZ86Fb/6SG-lacZ86Fb* | *yw1118* |
| Figure 1H | *6SG-lacZ86Fb/6SG-lacZ86Fb* | *6SG-lacZ86Fb/6SG-lacZ86Fb* |
| Figure 1I | *6SG-lacZ51c/6SG-lacZ51c;6SG-lacZ86Fb/6SG-lacZ86Fb* | *6SG-lacZ51c/6SG-lacZ51c;6SG-lacZ86Fb/6SG-lacZ86Fb* |
| Figure 1J | *12CG-lacZ51c/12CG-lacZ51c;12CG-lacZ86Fb/12CG-lacZ86Fb* | *12CG-lacZ51c/12CG-lacZ51c;12CG-lacZ86Fb/12CG-lacZ86Fb* |
| Figure 1K | *G2S-lacZ86Fb/G2S-lacZ86Fb* | *G2S-lacZ86Fb/G2S-lacZ86Fb* |
|  | *G6S-lacZ86Fb/G6S-lacZ86Fb* | *G6S-lacZ86Fb/G6S-lacZ86Fb* |
|  | *G24S-lacZ86Fb/G24S-lacZ86Fb* | *G24S-lacZ86Fb/G24S-lacZ86Fb* |
| Figure 1L | *6SG-lacZ86Fb/6SG-lacZ86Fb* | *6SG-lacZ86Fb/6SG-lacZ86Fb* |
|  | *12CG-lacZ86Fb/12CG-lacZ86Fb* | *12CG-lacZ86Fb/12CG-lacZ86Fb* |
| Figure 2A | *N55e11* *FRT19A/FM7c* | *yw1118* |
| Figure 2B | *N55e11* *FRT19A/FM7c* | *G6S-lacZ86Fb/G6S-lacZ86Fb* |
| Figure 2C | *N55e11* *FRT19A/FM7c* | *yw1118* |
|  | *N55e11* *FRT19A/FM7c* | *6SG-lacZ86Fb/6SG-lacZ86Fb* |
|  | *yw1118* | *6SG-lacZ86Fb/6SG-lacZ86Fb* |
| Figure 2D | *PBac{N-GFP.FLAG}/PBac{N-GFP.FLAG}* | *PBac{N-GFP.FLAG}/PBac{N-GFP.FLAG}* |
| Figure 2E | *6SG-lacZ51c/6SG-lacZ51c;PBac{N-GFP.FLAG}/PBac{N-GFP.FLAG}* | *6SG-lacZ51c/6SG-lacZ51c;PBac{N-GFP.FLAG}/PBac{N-GFP.FLAG}* |
| Figure 2F | *6SG-lacZ51c/6SG-lacZ51c* | *6SG-lacZ51c/6SG-lacZ51c* |
|  | *6SG-lacZ51c/6SG-lacZ51c;PBac{N-GFP.FLAG}/PBac{N-GFP.FLAG}* | *6SG-lacZ51c/6SG-lacZ51c;PBac{N-GFP.FLAG}/PBac{N-GFP.FLAG}* |
|  | *6SG-lacZ51c/6SG-lacZ51c;6SG-lacZ86Fb/6SG-lacZ86Fb* | *H1/TM6B, Tb1* |
| Figure 2G | *yw1118* | *H1/TM6B, Tb1* |
| Figure 2H | *6SG-lacZ51c/6SG-lacZ51c;6SG-lacZ86Fb/6SG-lacZ86Fb* | *H1/TM6B, Tb1* |
| Figure 2I | *yw1118* | *H1/TM6B, Tb1* |
|  | *6SG-lacZ51c/6SG-lacZ51c;6SG-lacZ86Fb/6SG-lacZ86Fb* | *H1/TM6B, Tb1* |
|  | *12CG-lacZ51c/12CG-lacZ51c;12CG-lacZ86Fb/12CG-lacZ86Fb* | *H1/TM6B, Tb1* |
| Figure 2J | *N55e11* *FRT19A/FM7c* | *yw1118* |
| Figure 2K | *G6S-lacZ86Fb/G6S-lacZ86Fb* | *G6S-lacZ86Fb/G6S-lacZ86Fb* |
| Figure 2L | *N55e11* *FRT19A/FM7c* | *yw1118* |
|  | *N55e11* *FRT19A/FM7c* | *G6S-lacZ86Fb/G6S-lacZ86Fb* |
|  | *6SG-lacZ51c/6SG-lacZ51c;6SG-lacZ86Fb/6SG-lacZ86Fb* | *yw1118* |
|  | *yw1118* | *H1/TM6B, Tb1* |
|  | *6SG-lacZ51c/6SG-lacZ51c;6SG-lacZ86Fb/6SG-lacZ86Fb* | *H1/TM6B, Tb1* |
| Figure 3A | *6SG-lacZ51c/6SG-lacZ51c;6SG-lacZ86Fb/6SG-lacZ86Fb* | *yw1118* |
|  | *6SG-lacZ51c/6SG-lacZ51c;6SG-lacZ86Fb/6SG-lacZ86Fb* | *FRT80 cdk8K185/TM6B* |
|  | *6SG-lacZ51c/6SG-lacZ51c;6SG-lacZ86Fb/6SG-lacZ86Fb* | *FRT82 cycCY5/TM6B* |
|  | *6SG-lacZ51c/6SG-lacZ51c;6SG-lacZ86Fb/6SG-lacZ86Fb* | *ktoT241 FRT80B/TM6B, Tb1* |
|  | *6SG-lacZ51c/6SG-lacZ51c;6SG-lacZ86Fb/6SG-lacZ86Fb* | *skdT13 FRT80B/TM6B, Tb1* |
|  | *6SG-lacZ51c/6SG-lacZ51c;6SG-lacZ86Fb/6SG-lacZ86Fb* | *ago1 FRT80B/TM6B, Tb1* |
| Figure 3B | *N55e11* *FRT19A/FM7c* | *yw1118* |
|  | *N55e11* *FRT19A/FM7c* | *FRT80 cdk8K185/TM6B* |
|  | *N55e11* *FRT19A/FM7c* | *FRT82 cycCY5/TM6B* |
|  | *N55e11* *FRT19A/FM7c* | *ktoT241 FRT80B/TM6B, Tb1* |
|  | *N55e11* *FRT19A/FM7c* | *skdT13 FRT80B/TM6B, Tb1* |
|  | *N55e11* *FRT19A/FM7c* | *ago1 FRT80B/TM6B, Tb1* |
| Figure 3D | *G24S-GFP51c/G24S-GFP51c;G24S-GFP86Fb/G24S-GFP86Fb* | *yw1118* |
|  | *G24S51c/G24S51c; G24S86Fb/G24S86Fb* | *yw1118* |
|  | *G24S-GFP51c/G24S-GFP51c;G24S-GFP86Fb/G24S-GFP86Fb* | *skdT413 FRT80B/TM6B, Tb1* |
|  | *G24S51c/G24S51c; G24S86Fb/G24S86Fb* | *skdT413 FRT80B/TM6B, Tb1* |
| Figure 4C | *6S-GFP22A/6S-GFP22A;G6S-lacZ86Fb/G6S-lacZ86Fb* | *yw1118* |
|  | *6S-GFP22A/6S-GFP22A;G6S-lacZ86Fb/G6S-lacZ86Fb* | *skdT413 FRT80B/TM6B, Tb1* |
|  | *6S-GFP22A/6S-GFP22A;(G6S)2-lacZ86Fb/(G6S)2-lacZ86Fb* | *yw1118* |
|  | *6S-GFP22A/6S-GFP22A;(G6S)2-lacZ86Fb/(G6S)2-lacZ86Fb* | *skdT413 FRT80B/TM6B, Tb1* |
|  | *6S-GFP22A/6S-GFP22A;(G6S)3-lacZ86Fb/(G6S)3-lacZ86Fb* | *yw1118* |
|  | *6S-GFP22A/6S-GFP22A;(G6S)3-lacZ86Fb/(G6S)3-lacZ86Fb* | *skdT413 FRT80B/TM6B, Tb1* |
| Figure 4D | *6SG-lacZ51c/6SG-lacZ51c;G-lacZ86Fb/G-lacZ86Fb* | *yw1118* |
| Figure 4E | *6S-GFP22A/6S-GFP22A;G6S-lacZ86Fb/G6S-lacZ86Fb* | *yw1118* |
| Figure 4F | *6S-GFP22A/6S-GFP22A;(G6S)2-lacZ86Fb/(G6S)2-lacZ86Fb* | *yw1118* |
| Figure 4G | *6S-GFP22A/6S-GFP22A;(G6S)3-lacZ86Fb/(G6S)3-lacZ86Fb* | *yw1118* |
| Figure 4J | *N55e11* *FRT19A/FM7c* | *yw1118* |
|  | *N55e11* *FRT19A/FM7c* | *FRT80 cdk8K185/TM6B* |
|  | *N55e11* *FRT19A/FM7c* | *FRT82 cycCY5/TM6B* |
|  | *N55e11* *FRT19A/FM7c* | *ktoT241 FRT80B/TM6B, Tb1* |
|  | *N55e11* *FRT19A/FM7c* | *skdT13 FRT80B/TM6B, Tb1* |
|  | *H1/TM6B, Tb1* | *yw1118* |
|  | *H1/TM6B, Tb1* | *FRT80 cdk8K185/TM6B* |
|  | *H1/TM6B, Tb1* | *FRT82 cycCY5/TM6B* |
|  | *H1/TM6B, Tb1* | *ktoT241 FRT80B/TM6B, Tb1* |
|  | *H1/TM6B, Tb1* | *skdT13 FRT80B/TM6B, Tb1* |
| Figure 5B | *G6S-lacZ86Fb/G6S-lacZ86Fb* | *G6S-lacZ86Fb/G6S-lacZ86Fb* |
|  | *G6Sm8-lacZ86Fb/G6Sm8-lacZ86Fb* | *G6Sm8-lacZ86Fb/G6Sm8-lacZ86Fb* |
| Figure 5C | *Zld-lacZ86Fb /Zld-lacZ86Fb* | *Zld-lacZ86Fb /Zld-lacZ86Fb* |
|  | *Zld6S-lacZ86Fb /Zld6S-lacZ86Fb* | *Zld6S-lacZ86Fb /Zld6S-lacZ86Fb* |
|  | *Zld12C-lacZ86Fb /Zld12C-lacZ86Fb* | *Zld12C-lacZ86Fb /Zld12C-lacZ86Fb* |
| Figure 5D | *Ebox-lacZ86Fb/Ebox-lacZ86F* | *Ebox-lacZ86Fb/Ebox-lacZ86F* |
|  | *Ebox6S-lacZ86Fb/Ebox6S-lacZ86Fb* | *Ebox6S-lacZ86Fb/Ebox6S-lacZ86Fb* |
|  | *Ebox12C-lacZ86Fb/Ebox12C-lacZ86Fb* | *Ebox12C-lacZ86Fb/Ebox12C-lacZ86Fb* |
| Figure 5E | *N55e11* *FRT19A/FM7c* | *0S-lacZ86Fb/0S-lacZ86Fb* |
|  | *N55e11* *FRT19A/FM7c* | *6S-lacZ86Fb/6S-lacZ86Fb* |
| Figure 1 —figure supplement 2A | *G-lacZ86Fb/G-lacZ86Fb* | *G-lacZ86Fb/G-lacZ86Fb* |
| Figure 1 —figure supplement 2B | *6S-lacZ86Fb/6S-lacZ86Fb* | *6S-lacZ86Fb/6S-lacZ86Fb* |
| Figure 1 —figure supplement 2C | *G-lacZ86Fb/G-lacZ86Fb* | *G-lacZ86Fb/G-lacZ86Fb* |
|  | *6S-lacZ86Fb/6S-lacZ86Fb* | *6S-lacZ86Fb/6S-lacZ86Fb* |
|  | *6SmutG-lacZ86Fb/6SmutG-lacZ86Fb* | *6SmutG-lacZ86Fb/6SmutG-lacZ86Fb* |
| Figure 1 —figure supplement 2D | *6SG-lacZ51c/6SG-lacZ51c* | *6SG-lacZ51c/6SG-lacZ51c* |
| Figure 1 —figure supplement 2E | *6SG-lacZ86Fb/6SG-lacZ86Fb* | *6SG-lacZ86Fb/6SG-lacZ86Fb* |
| Figure 1 —figure supplement 2F | *G6S-lacZ86Fb/G6S-lacZ86Fb* | *G6S-lacZ86Fb/G6S-lacZ86Fb* |
| Figure 1 —figure supplement 2G | *6SG-lacZ51c/6SG-lacZ51c;6SG-lacZ86Fb/6SG-lacZ86Fb* | *yw1118* |
| Figure 1 —figure supplement 2H | *6SG-lacZ51c/6SG-lacZ51c* | *6SG-lacZ51c/6SG-lacZ51c* |
|  | *6SG-lacZ86Fb/6SG-lacZ86Fb* | *6SG-lacZ86Fb/6SG-lacZ86Fb* |
|  | *G6S-lacZ86Fb/G6S-lacZ86Fb* | *G6S-lacZ86Fb/G6S-lacZ86Fb* |
|  | *6SG-lacZ51c/6SG-lacZ51c;6SG-lacZ86Fb/6SG-lacZ86Fb* | *yw1118* |
| Figure 2 —figure supplement 1 | *N1/FM7c* | *6SG-lacZ86Fb/6SG-lacZ86Fb* |
|  | *N1/FM7c* | *yw1118* |
| Figure 3 —figure supplement 1A | *6SG-lacZ51c/6SG-lacZ51c;6SG-lacZ86Fb/6SG-lacZ86Fb* | *yw1118* |
|  | *6SG-lacZ51c/6SG-lacZ51c;6SG-lacZ86Fb/6SG-lacZ86Fb* | *ktoT631 FRT80B/TM6B, Tb1* |
|  | *6SG-lacZ51c/6SG-lacZ51c;6SG-lacZ86Fb/6SG-lacZ86Fb* | *skdT413 FRT80B/TM6B, Tb1* |
|  | *6SG-lacZ51c/6SG-lacZ51c;6SG-lacZ86Fb/6SG-lacZ86Fb* | *ago3 FRT80B/TM6B, Tb1* |
| Figure 3 —figure supplement 1B | *N55e11* *FRT19A/FM7c* | *yw1118* |
|  | *N55e11* *FRT19A/FM7c* | *ktoT631 FRT80B/TM6B, Tb1* |
|  | *N55e11* *FRT19A/FM7c* | *skdT413 FRT80B/TM6B, Tb1* |
|  | *N55e11* *FRT19A/FM7c* | *ago3 FRT80B/TM6B, Tb1* |
| Figure 4 —figure supplement 1A | *yw1118* | *6S-GFP86Fb/6S-GFP86Fb* |
|  | *N55e11* *FRT19A/FM7i, ActGFP* | *6S-GFP86Fb/6S-GFP86Fb* |
