# Supplementary figures and images for: Enhancer architecture sensitizes cell specific responses to Notch gene dose via a bind and discard mechanism
Source: eLife journal article supplement (doi:10.7554/elife.53659), 2020-04-16

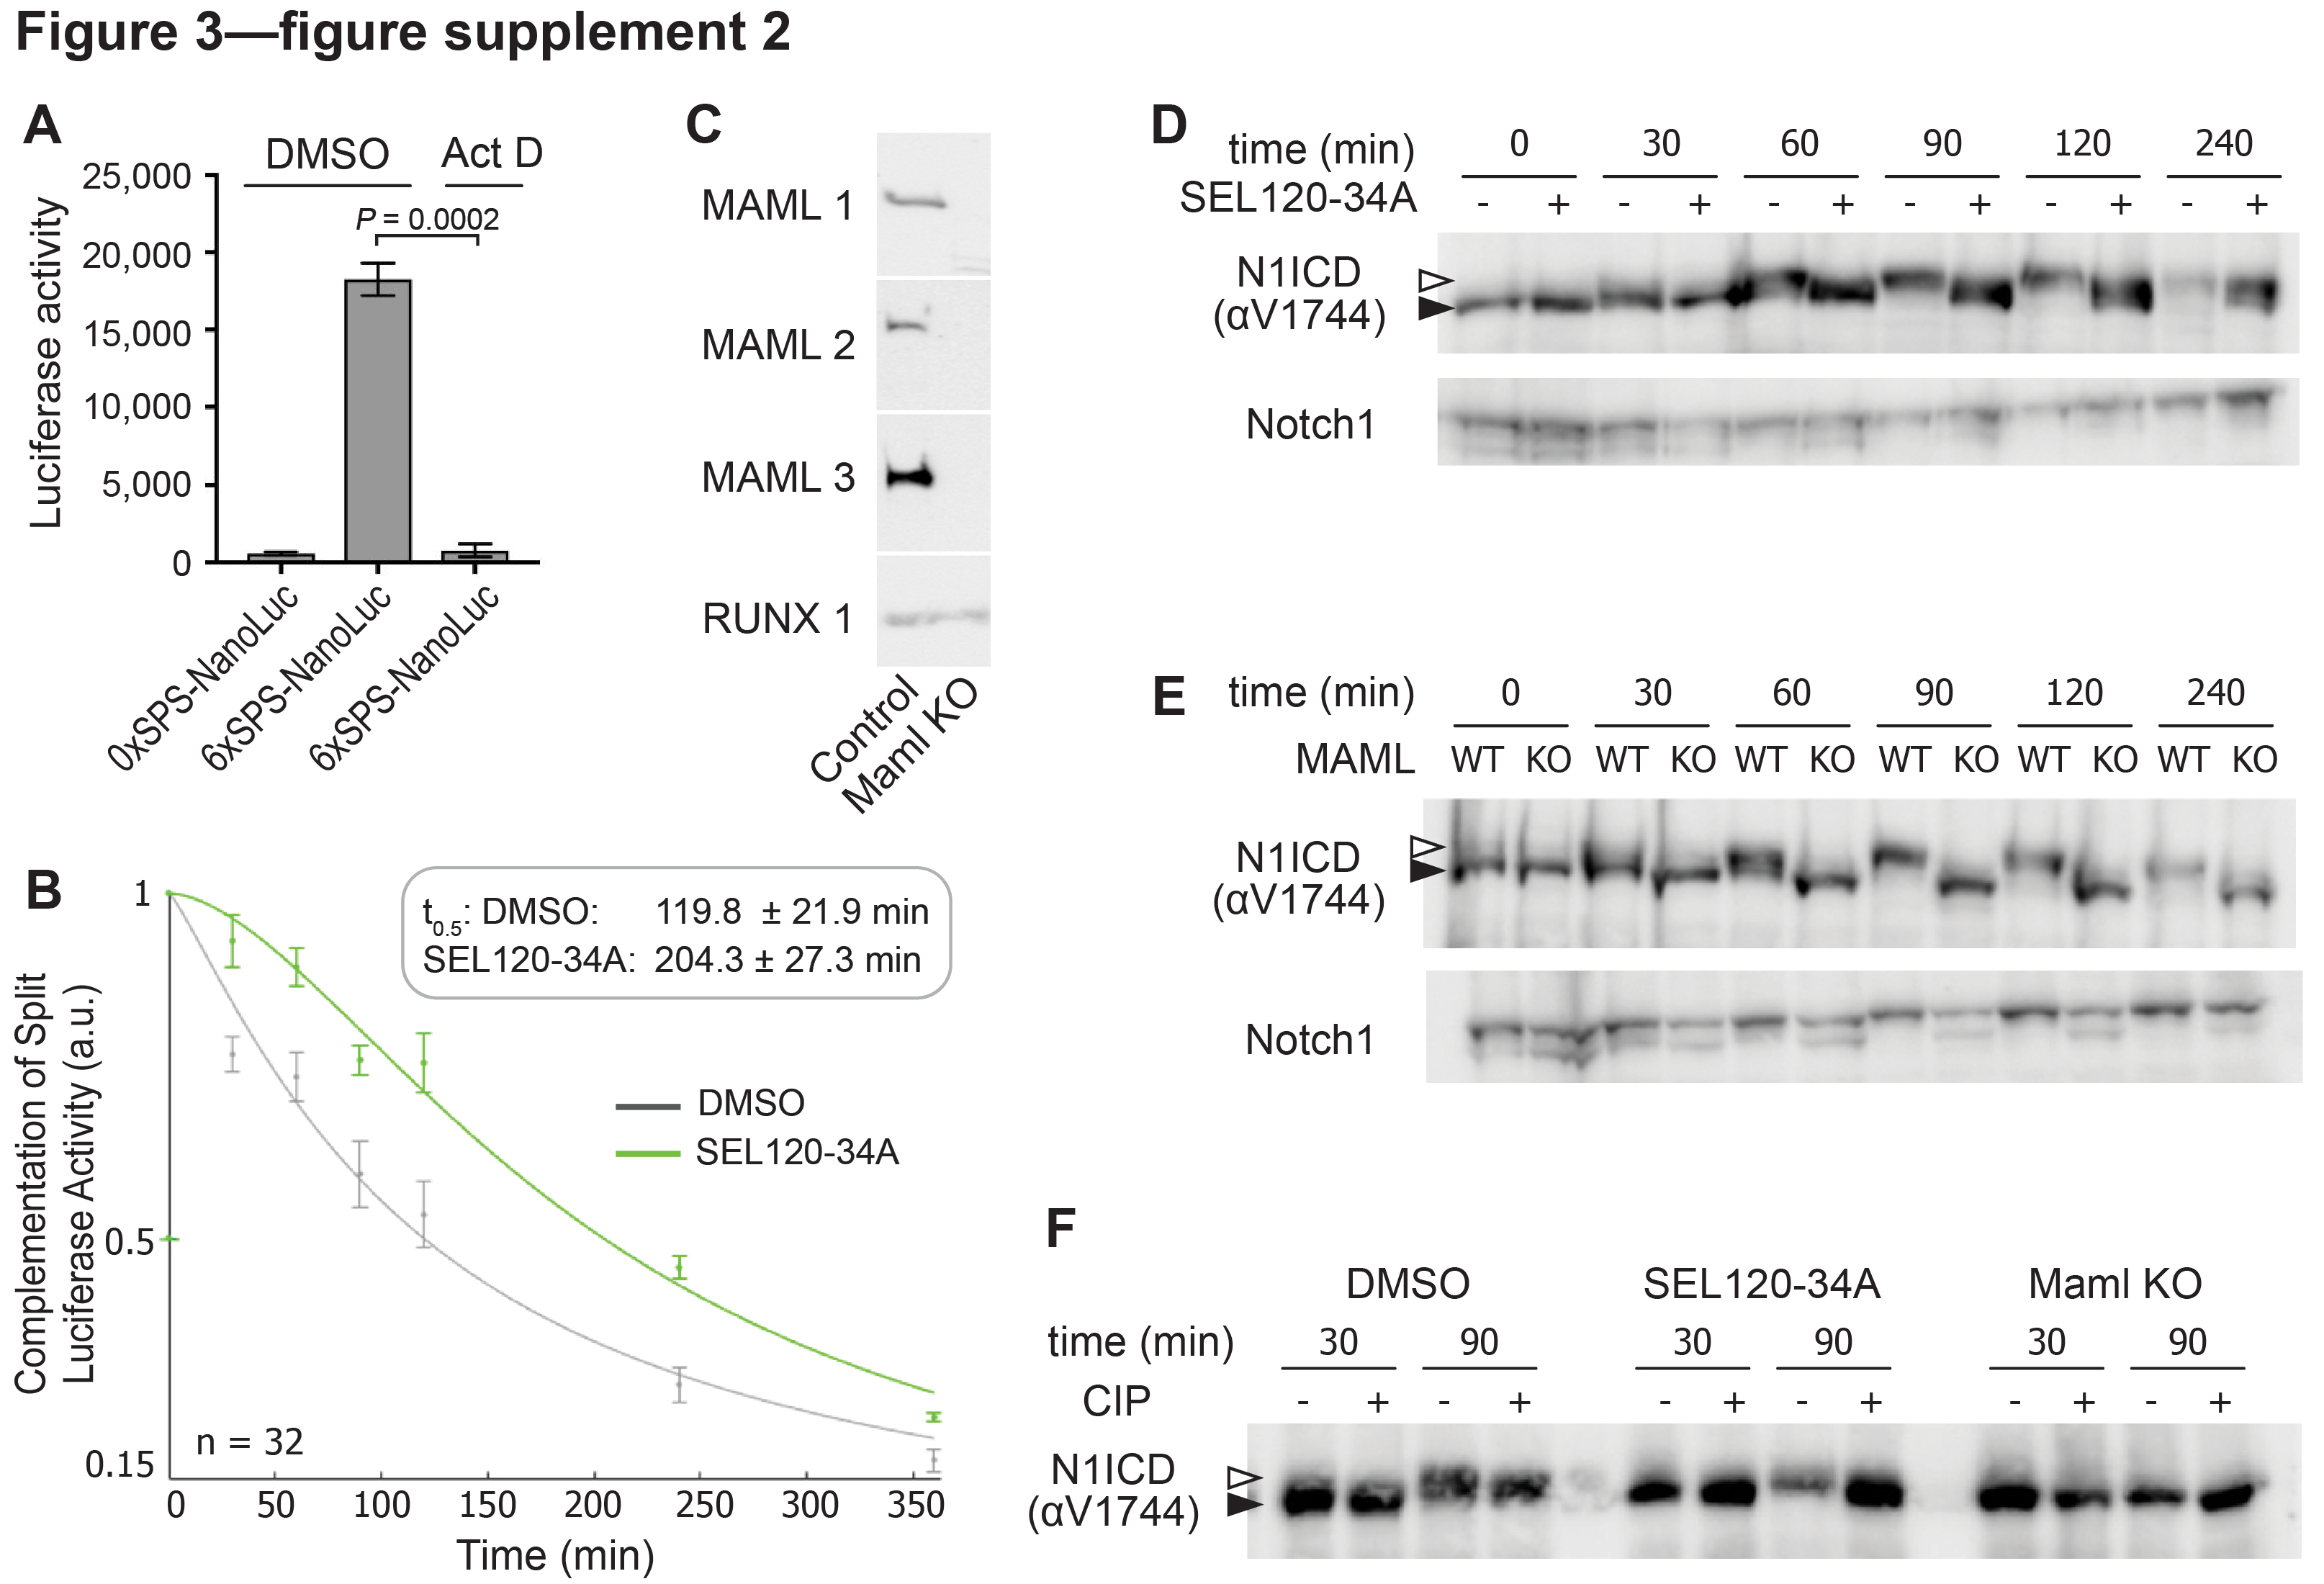

Supplement: supp [file elife-53659-supp-v1.zip › elife_poa_e53659_Figure_3_figure_supplement_2.jpg]

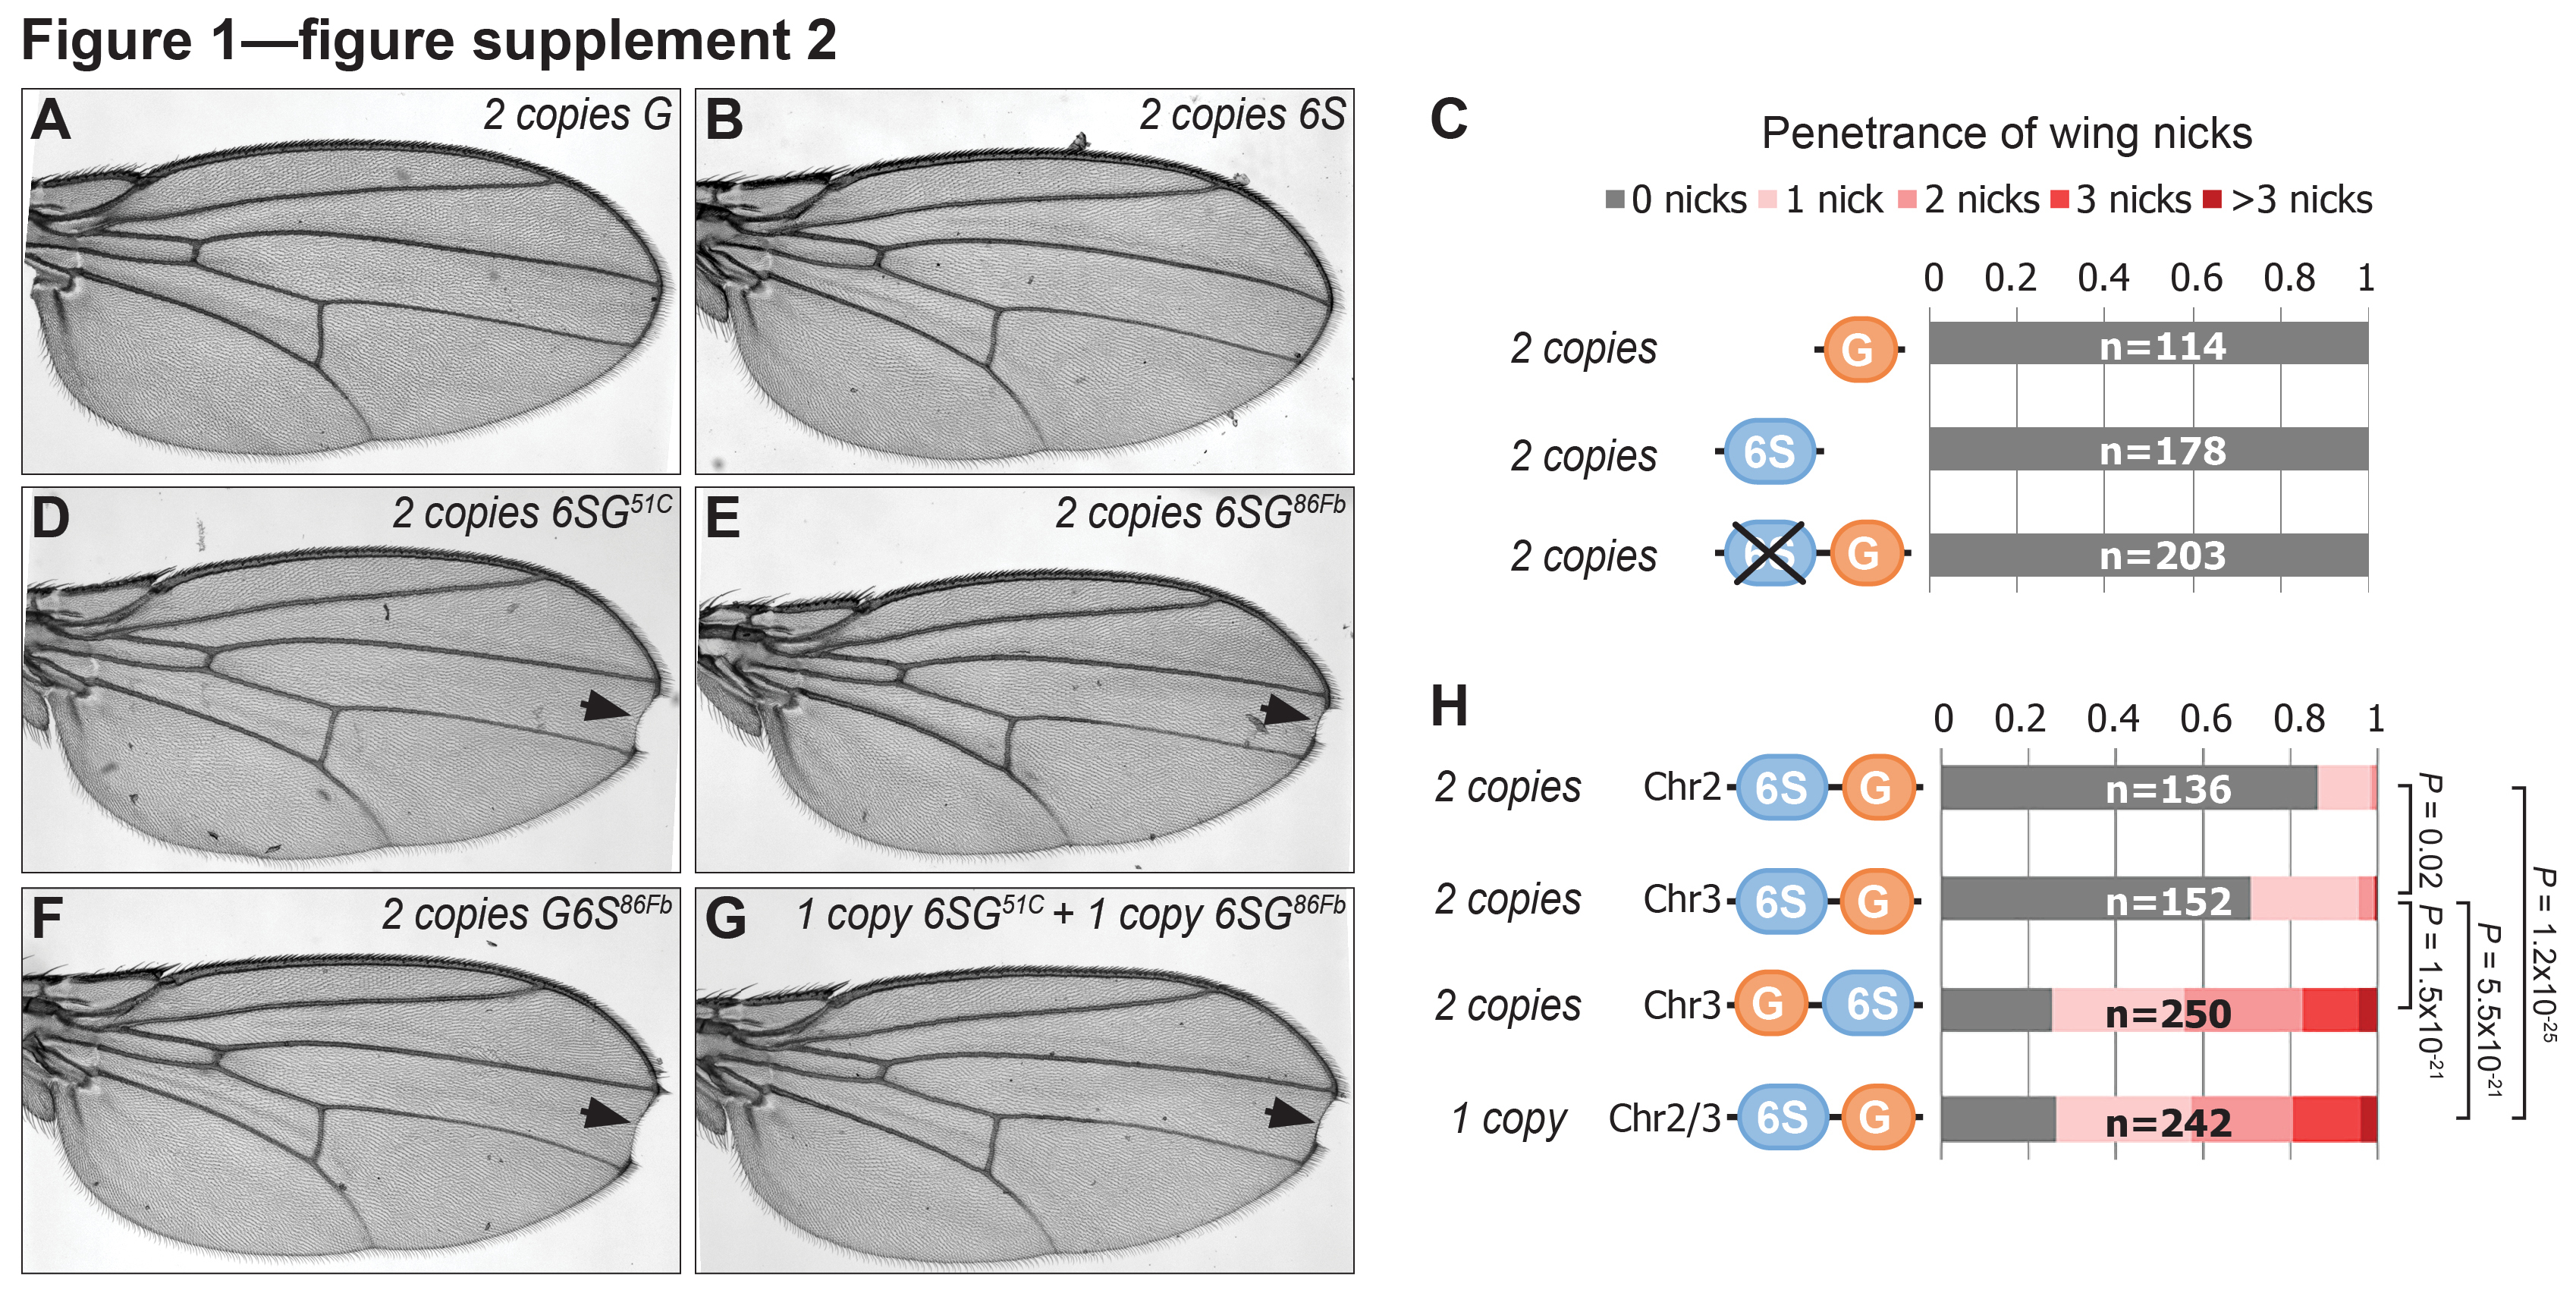

Supplement: supp [file elife-53659-supp-v1.zip › elife_poa_e53659_Figure_1_figure_supplement_2.jpg]

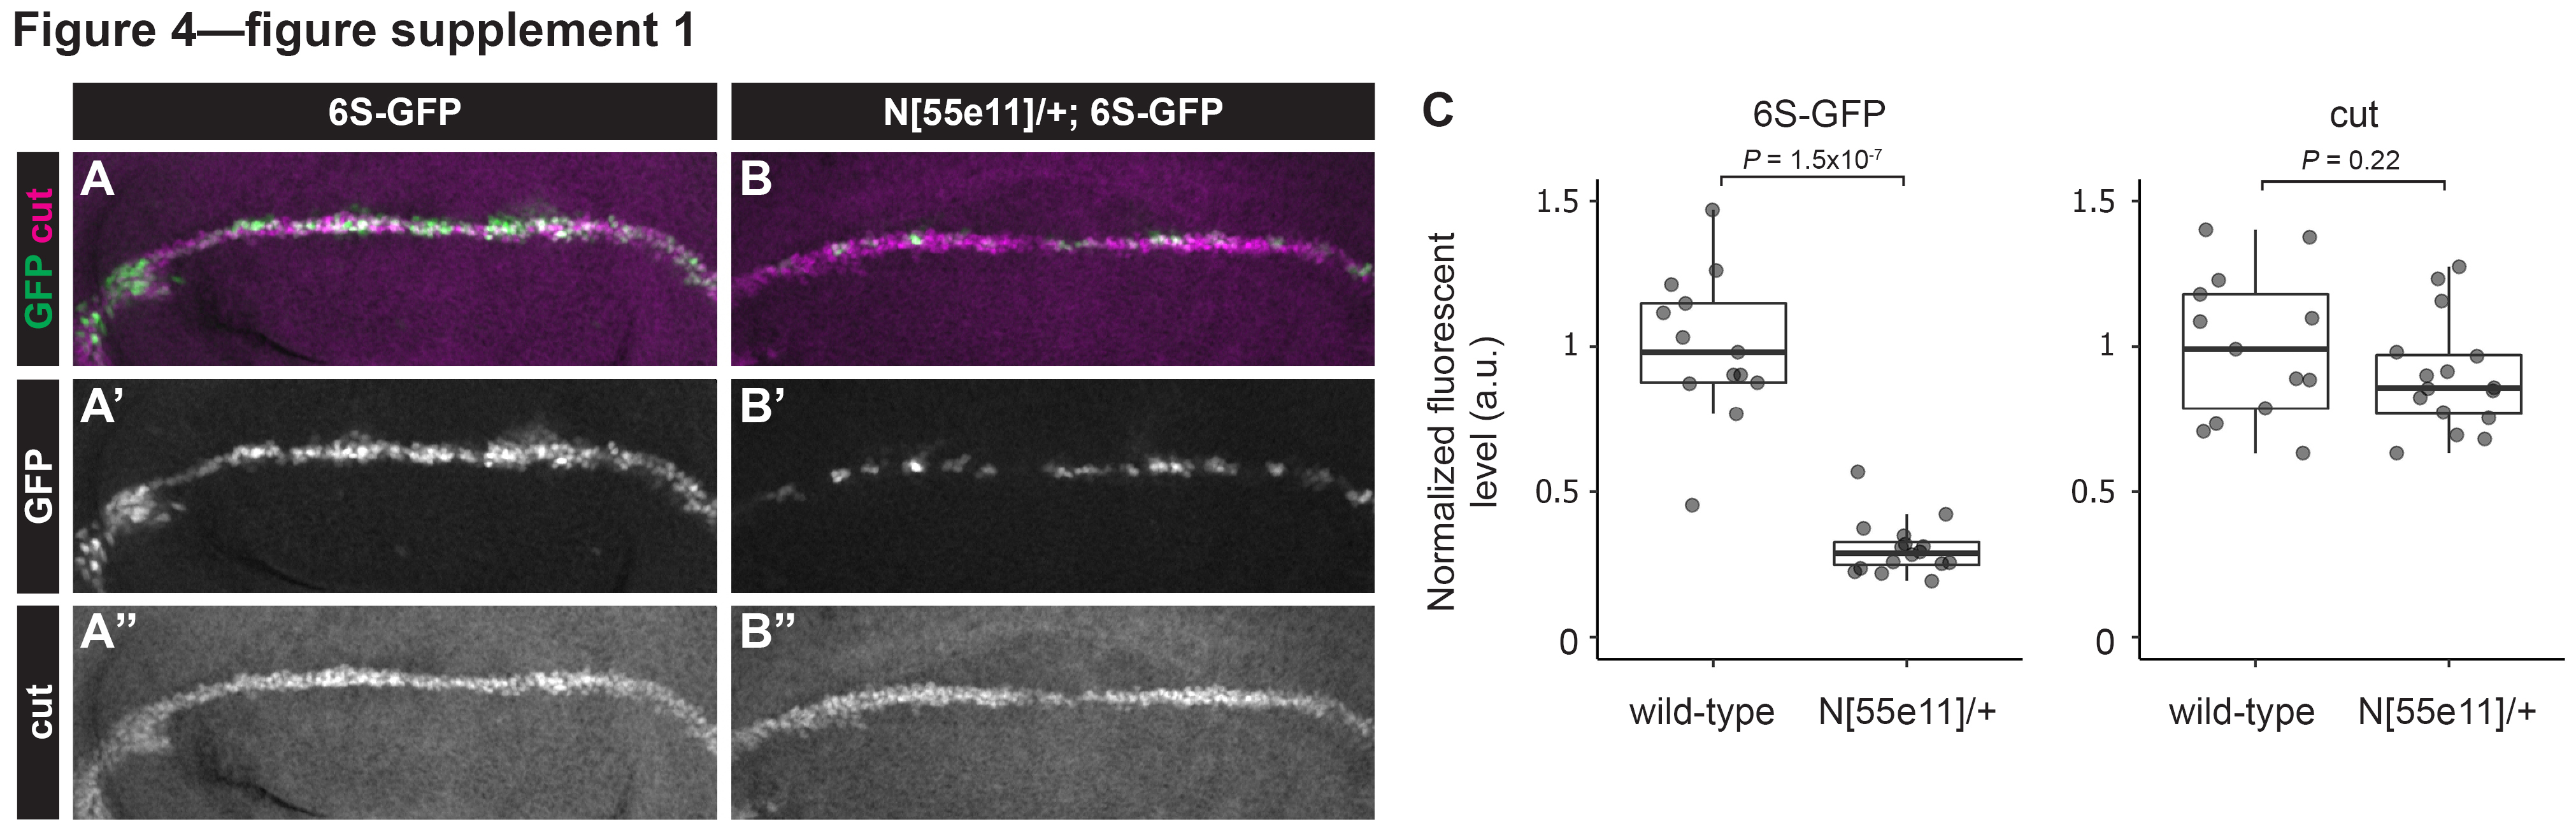

Supplement: supp [file elife-53659-supp-v1.zip › elife_poa_e53659_Figure_4_figure_supplement_1.jpg]

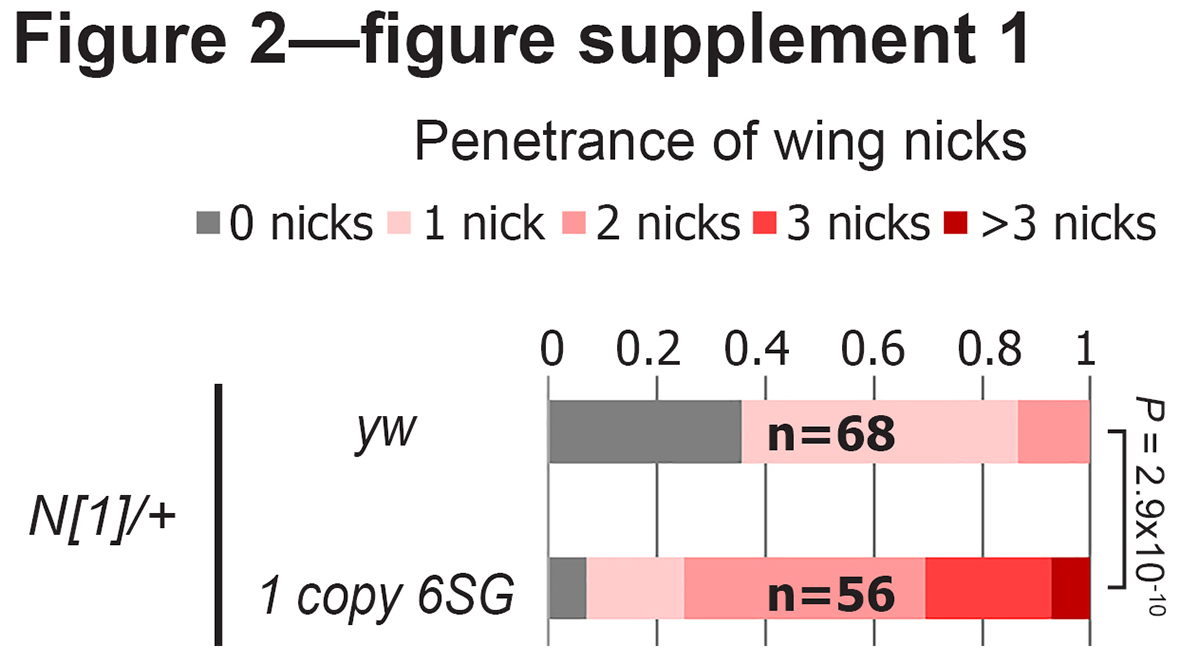

Supplement: supp [file elife-53659-supp-v1.zip › elife_poa_e53659_Figure_2_figure_supplement_1.jpg]

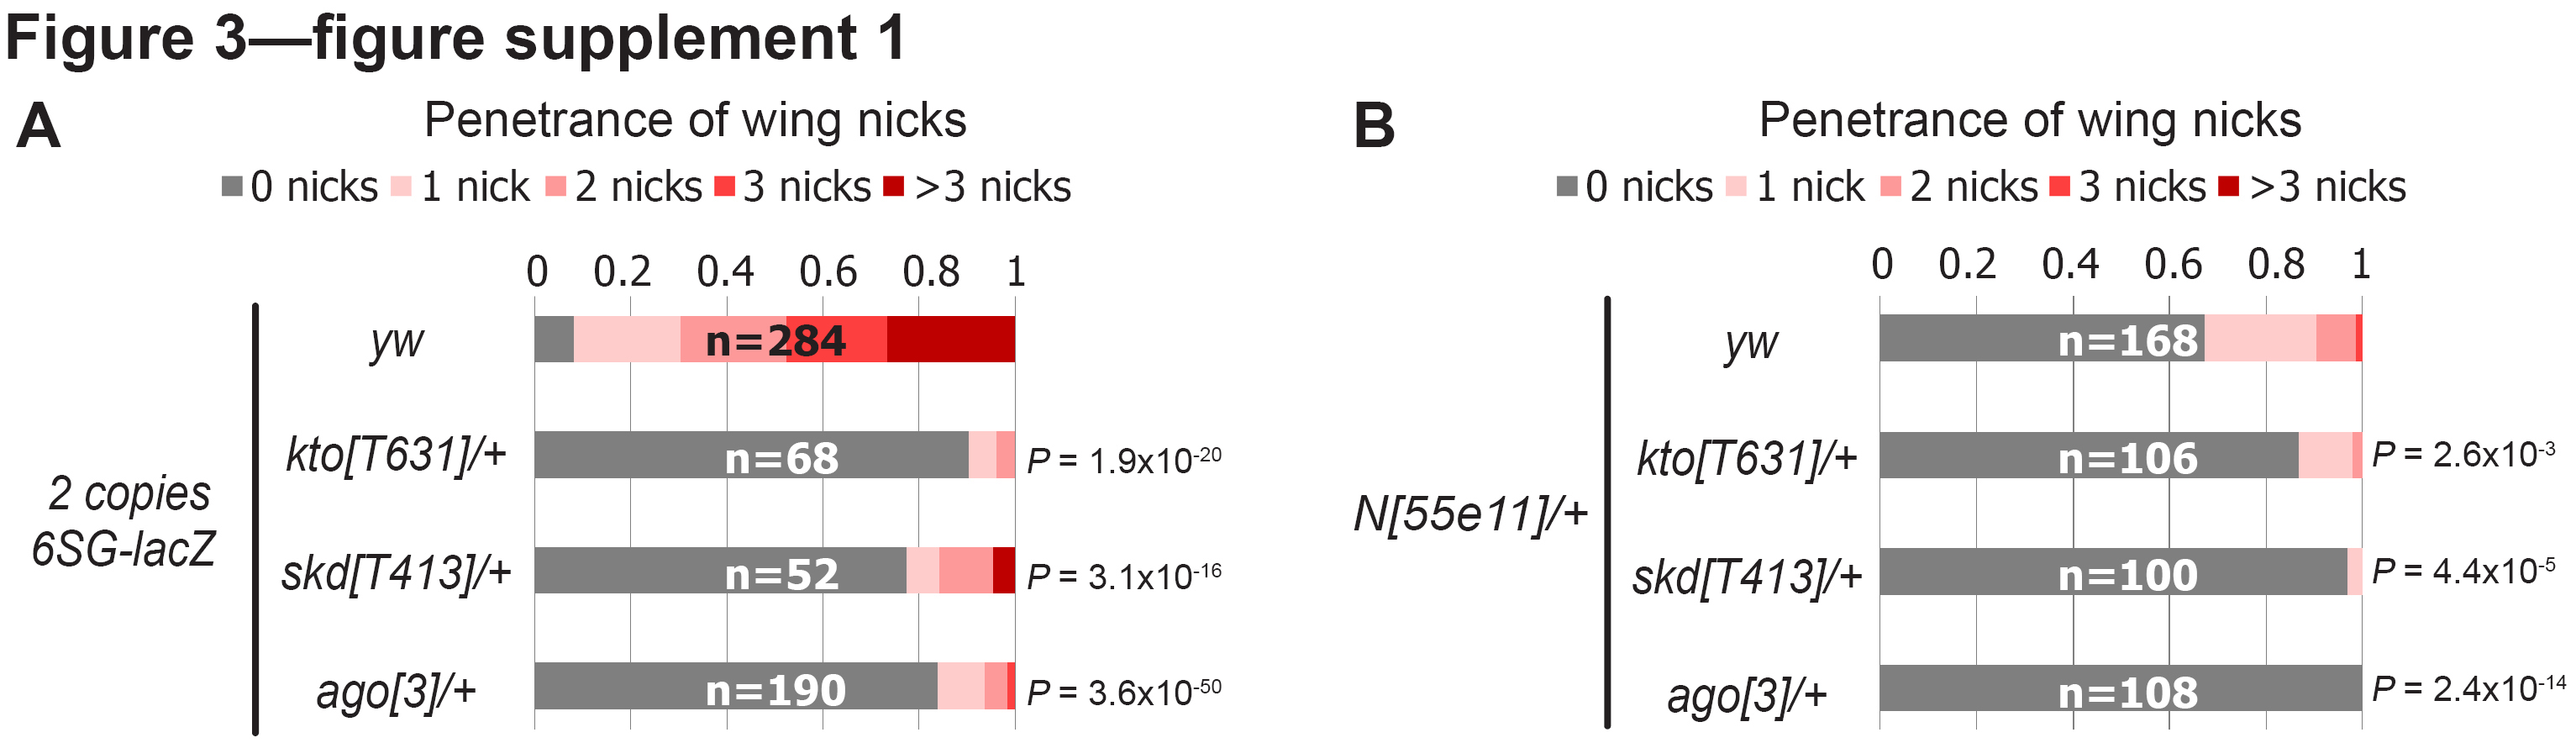

Supplement: supp [file elife-53659-supp-v1.zip › elife_poa_e53659_Figure_3_figure_supplement_1.jpg]

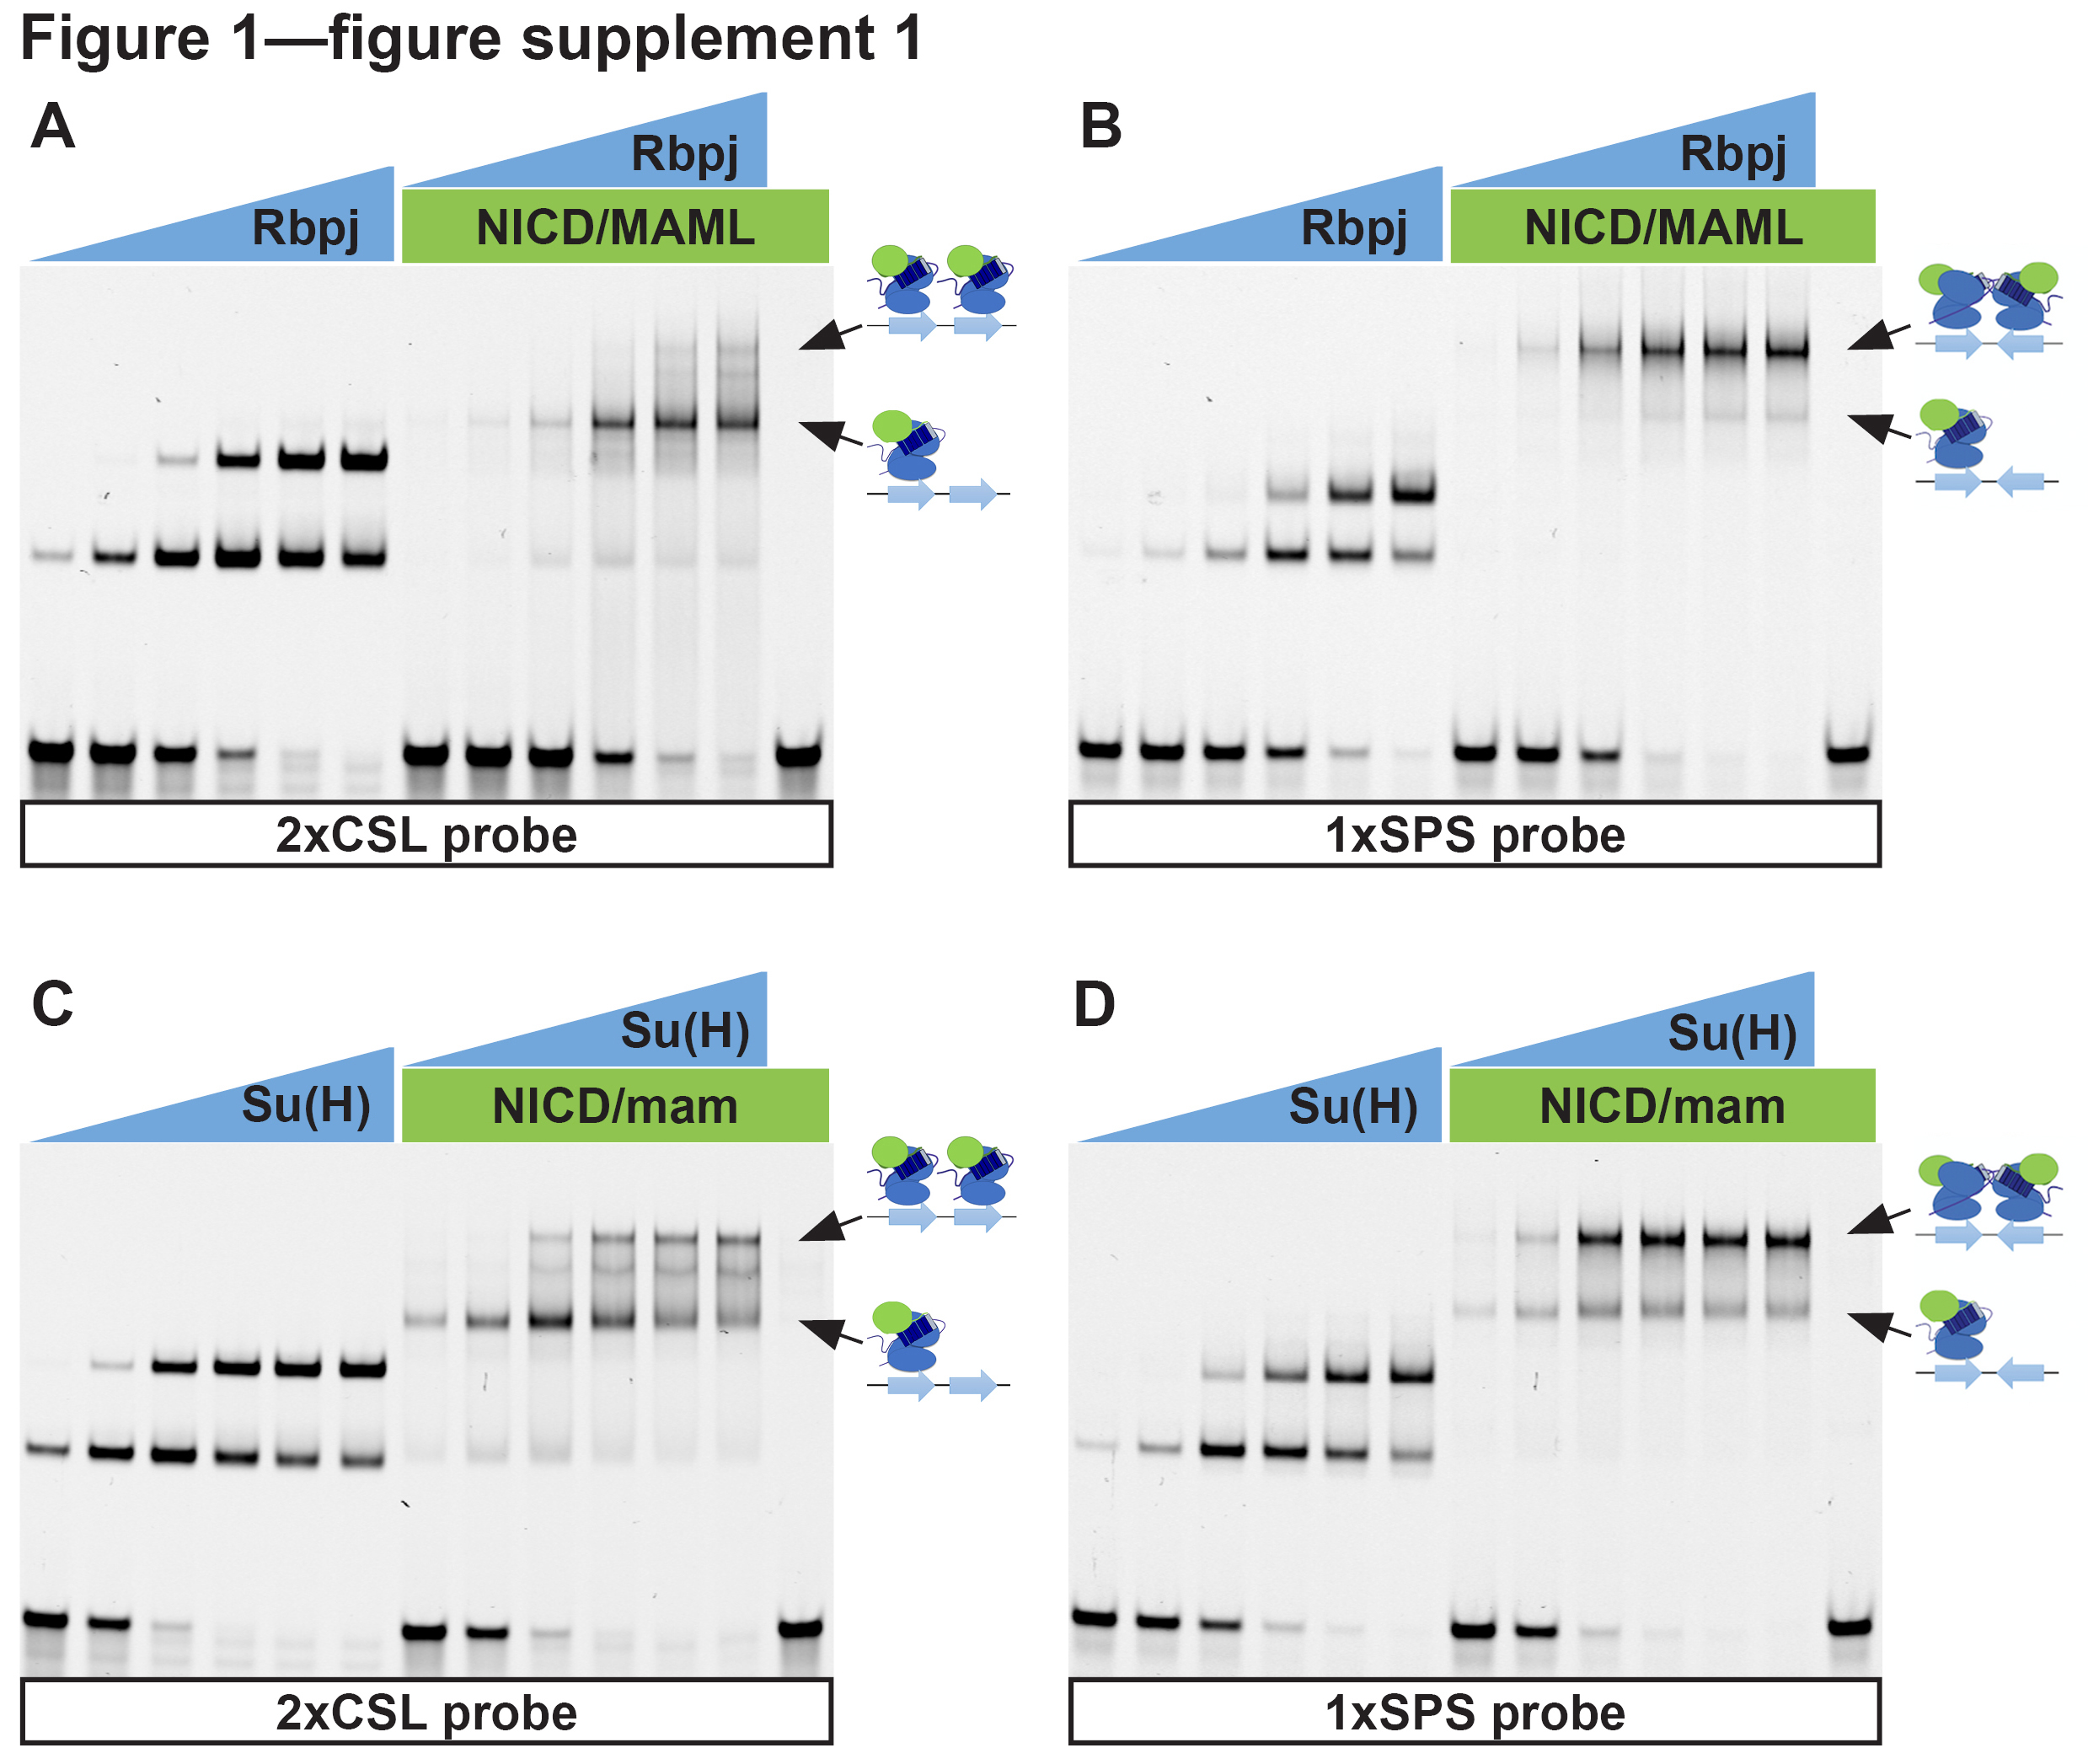

Supplement: supp [file elife-53659-supp-v1.zip › elife_poa_e53659_Figure_1_figure_supplement_1.jpg]

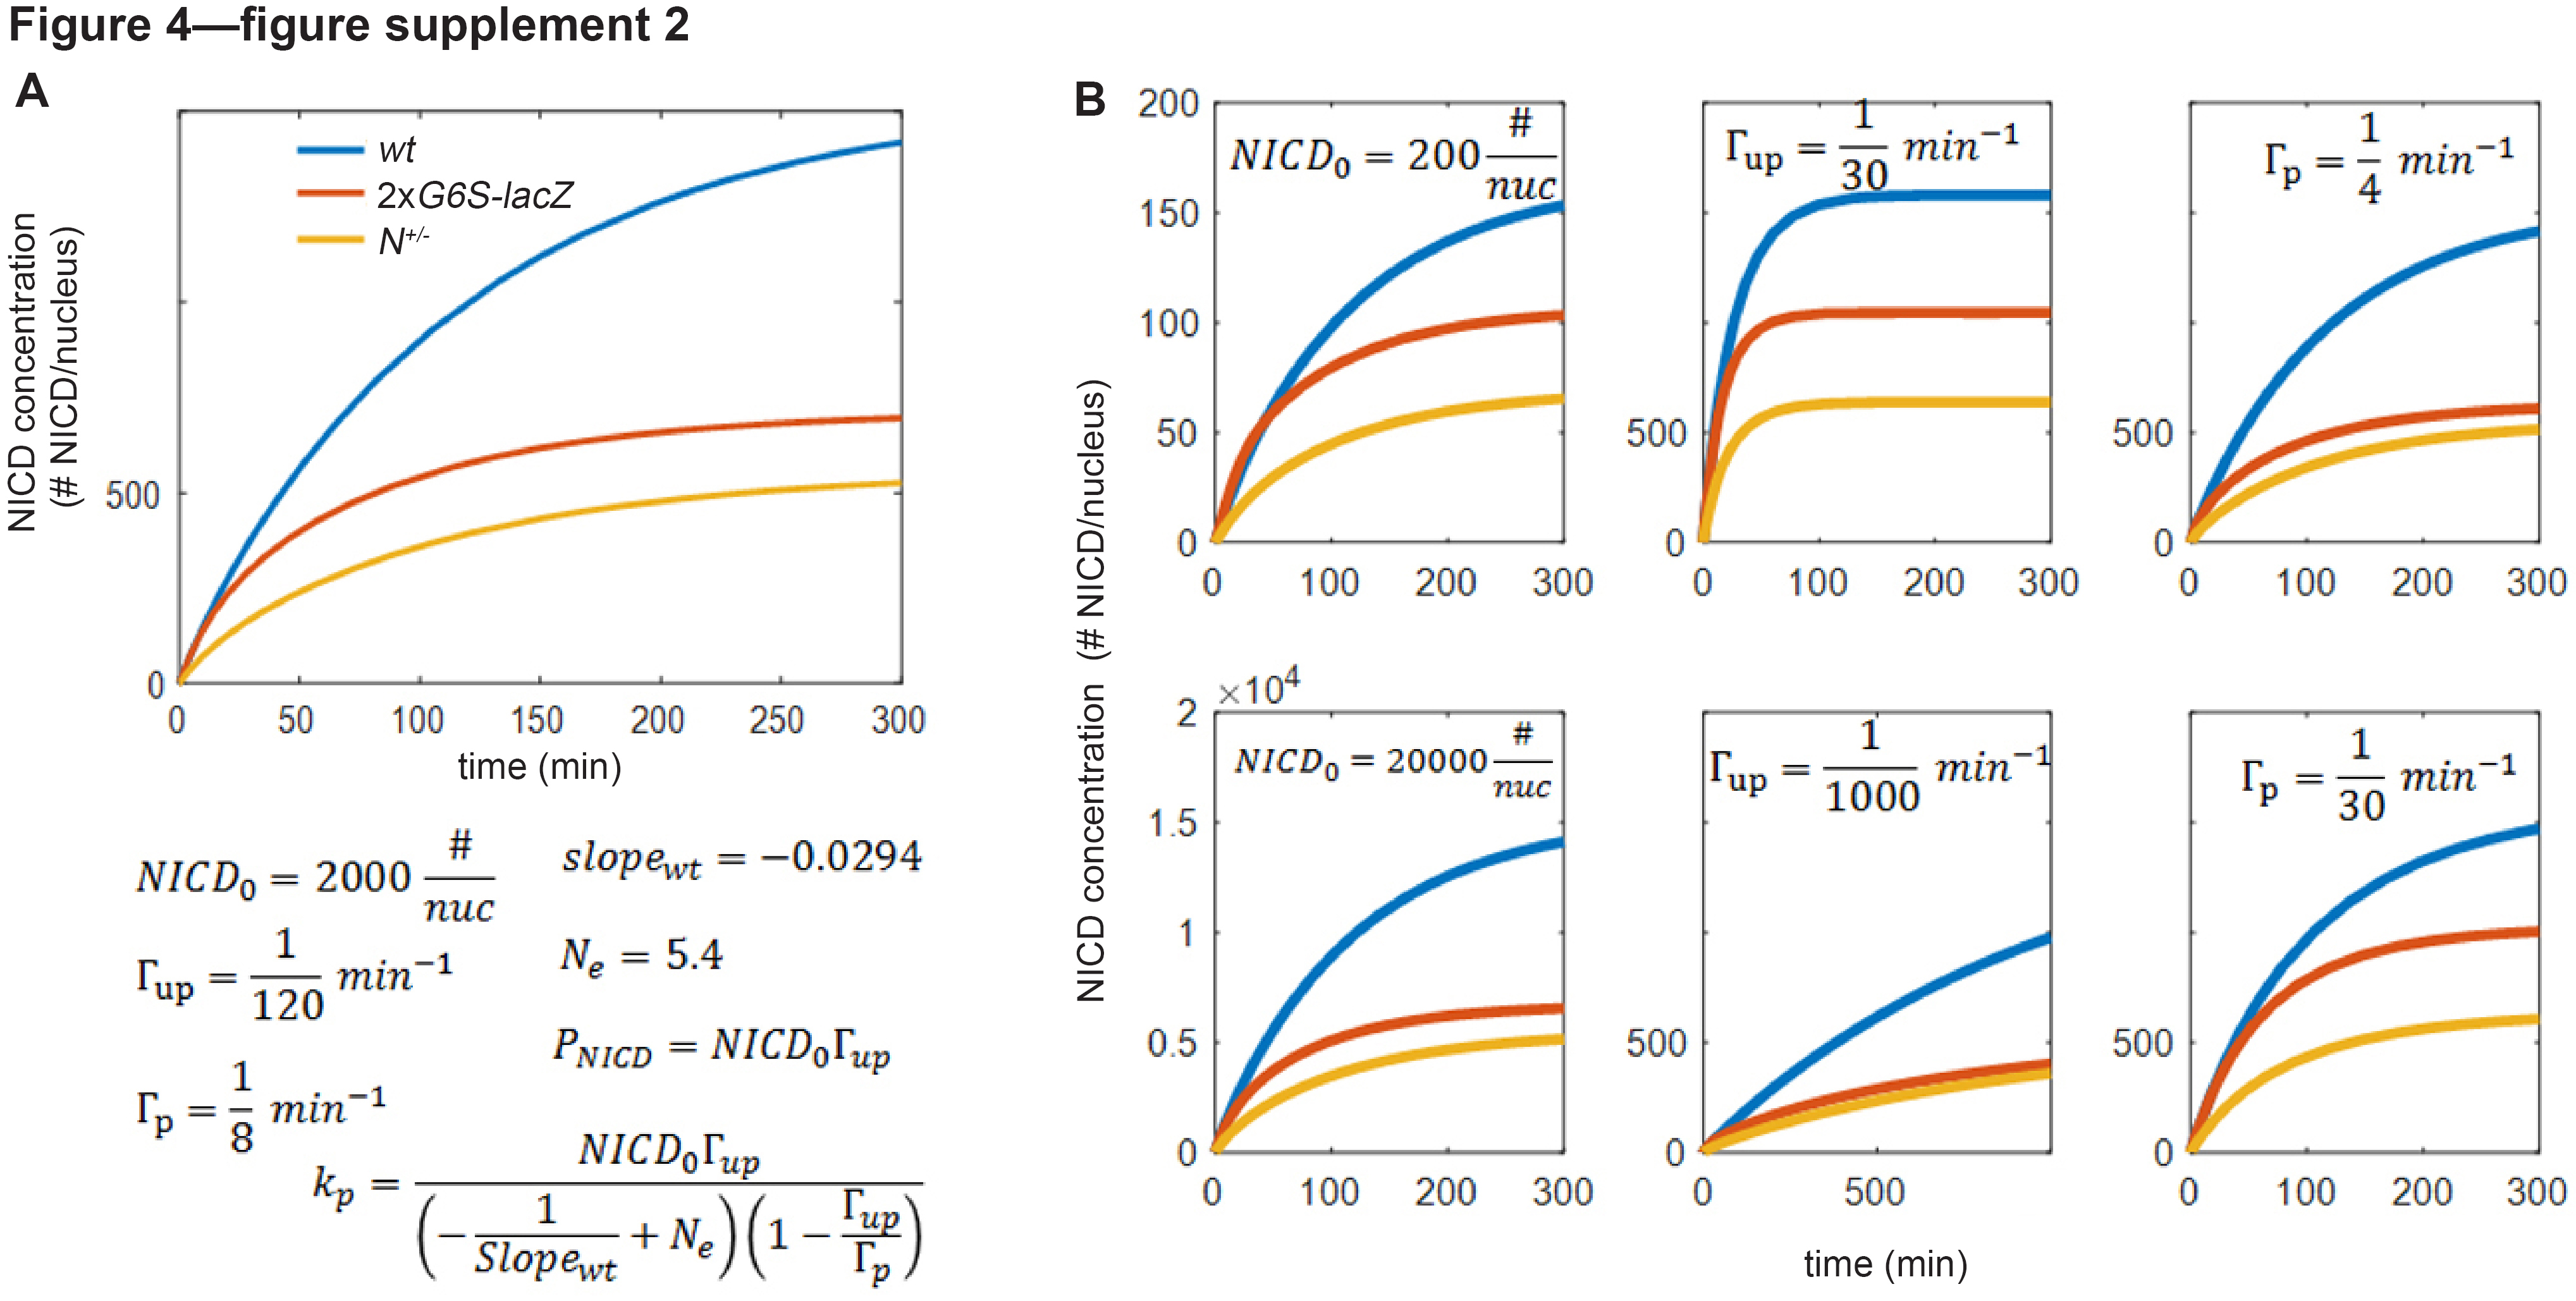

Supplement: supp [file elife-53659-supp-v1.zip › elife_poa_e53659_Figure_4_figure_supplement_2.jpg]
